# Supplementary material for: Eco-Metabolomics and Metabolic Modeling: Making the Leap From Model Systems in the Lab to Native Populations in the Field
Source: Front Plant Sci. 2018 Nov 6;9:1556. doi: 10.3389/fpls.2018.01556 (PMC6232504; doi:10.3389/fpls.2018.01556)
Supplement: DATA SHEET S2 — SNP enriched genes in OOE1. [file Data_Sheet_2.CSV]

	gene	OOE1	OOE2	OOE3
19459	AT5G35930	0	168	168
17408	AT4G37460	2	112	112
1316	AT1G49630	1	109	110
5699	AT1G20060	0	97	98
15477	AT4G19490	0	80	92
20503	AT5G45060	21	126	91
16333	AT4G27370	3	86	86
9771	AT2G17700	2	86	86
14679	AT3G21630	0	86	86
12234	AT3G55160	2	82	82
15745	AT4G22200	0	82	82
21444	AT5G53430	4	75	81
24874	AT5G27270	4	79	80
16395	AT4G27870	0	76	77
2524	AT1G62430	6	75	75
4211	AT1G77590	3	75	75
15838	AT4G22990	1	70	70
22821	AT5G65750	1	69	69
16843	AT4G31990	0	69	69
22857	AT5G66030	14	68	68
9680	AT2G16920	0	67	67
8615	AT2G42640	1	61	61
14831	AT3G23020	4	59	59
9909	AT2G18915	1	58	58
18311	AT4G11440	1	52	58
6698	AT2G24720	3	57	57
15846	AT4G23050	5	56	56
15719	AT4G21940	0	52	52
18108	AT4G09680	144	2	30
18379	AT4G12010	77	18	16
18353	AT4G11810	64	2	11
2164	AT1G58350	75	13	10
1089	AT1G47570	66	10	8
9430	AT2G13680	81	8	8
23745	AT5G16280	79	6	8
15442	AT4G19110/	64	0	8	AT4G19112
1659	AT1G52780	59	8	7
14837	AT3G23070	90	7	7
1727	AT1G53310	58	6	7
15399	AT4G18810	60	2	6
2817	AT1G64990	135	1	6
11011	AT3G43920	122	0	5
24543	AT5G24060	69	4	4
15401	AT4G18820	79	2	3
2894	AT1G65590	60	2	3
24861	AT5G27110	94	3	2
10947	AT3G43190	92	2	2
20348	AT5G43910	68	2	2
4180	AT1G77260	60	2	2
19553	AT5G37310	78	1	2
24892	AT5G27430	54	1	2
20365	AT5G44030	88	0	2
6143	AT1G24030
19132	AT4G17710	60	0	2
20463	AT5G44740	70	3	1
24862	AT5G27120	54	2	1
24431	AT5G23050	91	1	1
20755	AT5G47260	73	1	1
17449	AT4G37930	57	1	1
14417	AT3G19270	56	1	1
20606	AT5G46020	54	1	1
15918	AT4G23700	53	1	1
12489	AT3G57430	52	1	1
3154	AT1G67790	89	0	1	AT1G67792
1335	AT1G49820	57	0	1
9963	AT2G19410	54	0	1
24784	AT5G26240	111	50	0
2187	AT1G59520	116	21	0
1615	AT1G52410	62	7	0
370	AT1G32090	58	7	0
744	AT1G36320	68	4	0
18986	AT4G16570	98	2	0
13889	AT3G14460	121	0	0
20956	AT5G48940	73	0	0
2929	AT1G65910	70	0	0
9661	AT2G16730	60	0	0
11998	AT3G52890	59	0	0
19609	AT5G37810	59	0	0
4188	AT1G77340	53	0	0
22502	AT5G63020	53	0	0
11985	AT3G52750	52	0	0
